# Supplementary material
Source: Springer Nature journal article supplement (https://www.springermedizin.de/resource/supplementary/12967_2010_665_MOESM3_ESM.pdf/9577394)

**A**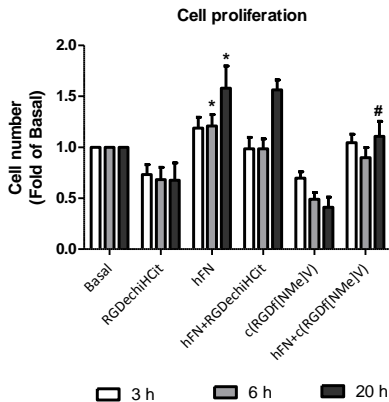**B**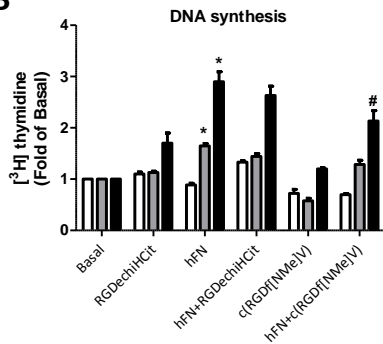**C**

| hFN           | - | - | + | + | - | + |
|---------------|---|---|---|---|---|---|
| RGDechiHCit   | - | + | - | + | - | - |
| c(RGDf[NMe]V) | - | - | - | - | + | + |

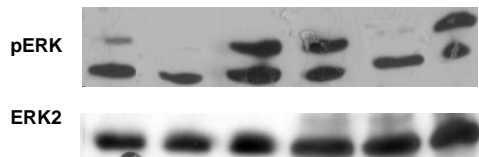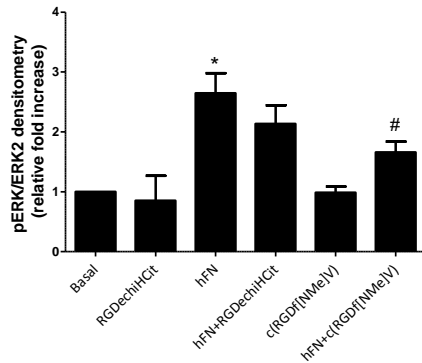

Supplement: MOESM3 [file 9577394]
